# Supplementary material
Source: MDPI journal article supplement (https://www.mdpi.com/2077-0472/12/5/723)
Supplement: s1 [file s1]

**Table S1.** Primers and protocols for RT-qPCR.

| Target Gene     | Primers <sup>a</sup>                                           | Product (bp) | PCR Protocol                                                                                                             |
|-----------------|----------------------------------------------------------------|--------------|--------------------------------------------------------------------------------------------------------------------------|
| <i>AOB-amoA</i> | amoA-1F/amoA-2R<br>(McTavish et al., 1993)                     | 491          | 94°C for 3 min,<br>40 cycles of 94°C for 30 s, 55°C for 30 s, 72°C for 45 s,<br>72°C for 10 min (Chen et al., 2008)      |
| <i>AOA-amoA</i> | Arch-amoAF/Arch-amoAR<br>(Francis et al., 2005)                | 635          | 94°C for 3 min,<br>40 cycles of 94°C for 30 s, 53°C for 1 min, 72°C for 1<br>min,<br>72°C for 10 min (Chen et al., 2008) |
| <i>nirK</i>     | nirK1F (Henry et al., 2004)/<br>nirK5R (Braker et al., 1998)   | 472          | 94°C for 3 min,<br>40 cycles of 95°C for 15 s, 58°C for 30 s, 72°C for 30 s,<br>72°C for 10 min (Bannert et al., 2011)   |
| <i>nirS</i>     | cd3AF (Michotey et al., 2000)/<br>R3cd (Throbäck et al., 2004) | 425          | 94°C for 3 min,<br>40 cycles of 95°C for 45 s, 57°C for 45 s, 72°C for 45 s,<br>72°C for 10 min (Bannert et al., 2011)   |

<sup>a</sup> F stands for forward primer and R stands for reverse primer.

**Table S2.** TC and TN contents in soil under different treatments at the harvest stages in the 2016 and 2017 growing seasons of purple caitai Different letters in the same column indicate significant differences at the level of 0.05. I, inorganic N fertilization; O, organic N fertilization; I+O, integrated organic-inorganic N fertilization; CK, no fertilization.

| Growing Season | Treatment | TC (g kg <sup>-1</sup> ) | TN (g kg <sup>-1</sup> ) |
|----------------|-----------|--------------------------|--------------------------|
| 2016           | I         | 11.43±0.41c              | 1.12±0.06a               |
|                | O         | 12.35±0.23b              | 1.13±0.08a               |
|                | I+O       | 13.33±0.21a              | 1.25±0.07a               |
|                | CK        | 9.24±0.12d               | 0.86±0.09b               |
| 2017           | I         | 11.49±0.22c              | 1.14±0.06b               |
|                | O         | 12.60±0.33b              | 1.15±0.08b               |
|                | I+O       | 13.51±0.39a              | 1.34±0.08a               |
|                | CK        | 9.31±0.26d               | 0.85±0.09c               |
